# Supplementary material for: Exploration of Driver Posture Monitoring Using Pressure Sensors with Lower Resolution
Source: MDPI journal article supplement (doi:10.3390/s21103346), 2021-05-12

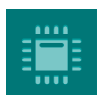

Table S1. Pressure features extracted from segmented pressure mats.

| Sensing area                                                                                                                                                                | Contact Area Proportion (CAP)                                                                                                                                                         | Center of Pressure (COP)                                                             | Pressure Ratio pair (PR, area 1 / area 2) |  |  |
|-----------------------------------------------------------------------------------------------------------------------------------------------------------------------------|---------------------------------------------------------------------------------------------------------------------------------------------------------------------------------------|--------------------------------------------------------------------------------------|-------------------------------------------|--|--|
| Backrest pressure mat                                                                                                                                                       |                                                                                                                                                                                       |                                                                                      |                                           |  |  |
| {Bi}(i = 1,2, ..., 12)                                                                                                                                                      | $\frac{\sum_{area} n(i,j)}{N}$ <p>Where n(<i>i,j</i>) = 1 if the cell at position (<i>i,j</i>) within a sensing area on the backrest is occupied, 0 otherwise. <i>N</i> = 44 × 42</p> | The COP of a sensing area in both up-down and left-right directions on the backrest  | Bi/B                                      |  |  |
| B                                                                                                                                                                           |                                                                                                                                                                                       |                                                                                      | --                                        |  |  |
| B1B2                                                                                                                                                                        |                                                                                                                                                                                       |                                                                                      | B1B2/B                                    |  |  |
| B3B4                                                                                                                                                                        |                                                                                                                                                                                       |                                                                                      | B3B4/B                                    |  |  |
| B5B6                                                                                                                                                                        |                                                                                                                                                                                       |                                                                                      | B5B6/B                                    |  |  |
| B7B8                                                                                                                                                                        |                                                                                                                                                                                       |                                                                                      | B7B8/B                                    |  |  |
| B9B10                                                                                                                                                                       |                                                                                                                                                                                       |                                                                                      | B11B12/B                                  |  |  |
| B11B12                                                                                                                                                                      |                                                                                                                                                                                       |                                                                                      | B11B12/B                                  |  |  |
| B1B5B9                                                                                                                                                                      |                                                                                                                                                                                       |                                                                                      | B1B5B9/B                                  |  |  |
| B2B6B10                                                                                                                                                                     |                                                                                                                                                                                       |                                                                                      | B2B6B10/B                                 |  |  |
| B3B7B11                                                                                                                                                                     |                                                                                                                                                                                       |                                                                                      | B3B7B11/B                                 |  |  |
| B4B8B12                                                                                                                                                                     |                                                                                                                                                                                       |                                                                                      | B4B8B12/B                                 |  |  |
| B1B2B3B4                                                                                                                                                                    |                                                                                                                                                                                       |                                                                                      | B1B2B3B4/B                                |  |  |
| B5B6B7B8                                                                                                                                                                    |                                                                                                                                                                                       |                                                                                      | B5B6B7B8/B                                |  |  |
| B9B10B11B12                                                                                                                                                                 |                                                                                                                                                                                       |                                                                                      | B9B10B11B12/B                             |  |  |
| B1B2B5B6B9B10                                                                                                                                                               |                                                                                                                                                                                       |                                                                                      | B1B2B5B6B9B10/B                           |  |  |
| B3B4B7B8B11B12                                                                                                                                                              | B3B4B7B8B11B12/B                                                                                                                                                                      |                                                                                      |                                           |  |  |
| Seat pan pressure mat                                                                                                                                                       |                                                                                                                                                                                       |                                                                                      |                                           |  |  |
| {Si}(i = 1,2, ..., 8)                                                                                                                                                       | $\frac{\sum_{area} n(i,j)}{N}$ <p>Where n(<i>i,j</i>) = 1 if the cell at position (<i>i,j</i>) within a sensing area on the seat pan is occupied, 0 otherwise. <i>N</i> = 44 × 42</p> | The COP of a sensing area in both fore-aft and left-right directions on the seat pan | Si/S                                      |  |  |
| S                                                                                                                                                                           |                                                                                                                                                                                       |                                                                                      | --                                        |  |  |
| S1S2                                                                                                                                                                        |                                                                                                                                                                                       |                                                                                      | S1S2/S<br>S1S2/S1S2S3S4                   |  |  |
| S3S4                                                                                                                                                                        |                                                                                                                                                                                       |                                                                                      | S3S4/S                                    |  |  |
| S5S6                                                                                                                                                                        |                                                                                                                                                                                       |                                                                                      | S5S6/S                                    |  |  |
| S7S8                                                                                                                                                                        |                                                                                                                                                                                       |                                                                                      | S7S8/S<br>S7S8/S5S6S7S8                   |  |  |
| S1S3                                                                                                                                                                        |                                                                                                                                                                                       |                                                                                      | S1S3/S<br>S1S3/S1S2S3S4<br>S1S3/S1S3S5S7  |  |  |
| S2S4                                                                                                                                                                        |                                                                                                                                                                                       |                                                                                      | S2S4/S                                    |  |  |
| S5S7                                                                                                                                                                        |                                                                                                                                                                                       |                                                                                      | S5S7/S<br>S5S7/S5S6S7S8                   |  |  |
| S6S8                                                                                                                                                                        |                                                                                                                                                                                       |                                                                                      | S6S8/S<br>S6S8/S2S4S6S8                   |  |  |
| S1S2S3S4                                                                                                                                                                    |                                                                                                                                                                                       |                                                                                      | S1S2S3S4/S                                |  |  |
| S5S6S7S8                                                                                                                                                                    |                                                                                                                                                                                       |                                                                                      | S5S6S7S8/S                                |  |  |
| S1S3S5S7                                                                                                                                                                    |                                                                                                                                                                                       |                                                                                      | S1S3S5S7/S                                |  |  |
| S2S4S6S8                                                                                                                                                                    |                                                                                                                                                                                       |                                                                                      | S2S4S6S8/S                                |  |  |
| Note. If one sensing area (individual subarea or combine subareas) has no contact with driver's body, the pressure features related to this sensing area will be given NaN. |                                                                                                                                                                                       |                                                                                      |                                           |  |  |

**Table S2.** Best feature combinations used by classifiers RF-trunk, RF-leftFoot and RF-rightFoot. X\_COP\_U (V) stands for the COP position of area X in left-right (up-down) direction on backrest and fore-aft (left-right) direction on seat pan. X\_CAP is the contact proportion within area X. X\_Y\_PR is referred to as the ratio of the pressure sum between area X and area Y. For each body part, the features are ranked according to their importance estimated by OOB errors.

| Important features used by RF-trunk     |                   |  |    |                  |  |    |                  |
|-----------------------------------------|-------------------|--|----|------------------|--|----|------------------|
| ID                                      | Feature           |  | ID | Feature          |  | ID | Feature          |
| 1                                       | B_CAP             |  | 10 | B2_B_PR          |  | 19 | S5S6S7S8_COP_V   |
| 2                                       | B2B6B10_B_PR      |  | 11 | S_CAP            |  | 20 | B5B6B7B8_B_PR    |
| 3                                       | B5_B_PR           |  | 12 | S4_S_PR          |  | 21 | S5S6S7S8_COP_U   |
| 4                                       | B1B5B9_B_PR       |  | 13 | S1S2S3S4_S_PR    |  | 22 | S_COP_V          |
| 5                                       | B_COP_U           |  | 14 | B6_B_PR          |  | 23 | S4_COP_V         |
| 6                                       | S_COP_U           |  | 15 | S7S8_S5S6S7S8_PR |  | 24 | B11_B_PR         |
| 7                                       | B9_B_PR           |  | 16 | B4B8B12_B_PR     |  | 25 | B7_B_PR          |
| 8                                       | S1S2S3S4_COP_U    |  | 17 | S5_S_PR          |  | 26 | S6S8_S2S4S6S8_PR |
| 9                                       | B_COP_V           |  | 18 | S1_S_PR          |  | 27 | S8_S_PR          |
| Important features used by RF-leftFoot  |                   |  |    |                  |  |    |                  |
| ID                                      | Feature           |  | ID | Feature          |  | ID | Feature          |
| 1                                       | S4_CAP            |  | 9  | S6_COP_V         |  | 17 | B1B2B3B4_CAP     |
| 2                                       | B9B10_CAP         |  | 10 | B_CAP            |  | 18 | B6_CAP           |
| 3                                       | B10_CAP           |  | 11 | B5B6_COP_U       |  | 19 | B1_CAP           |
| 4                                       | B4B8B12_B_PR      |  | 12 | S_CAP            |  | 20 | B1_COP_U         |
| 5                                       | B1B2B5B6B9B10_CAP |  | 13 | S3S4_CAP         |  | 21 | B9_CAP           |
| 6                                       | B9B10B11B12_CAP   |  | 14 | B1_B_PR          |  | 22 | S7_CAP           |
| 7                                       | S2_S_PR           |  | 15 | S1S3_S1S2S3S4_PR |  | 23 | S4_COP_U         |
| 8                                       | B5_CAP            |  | 16 | B7B8_COP_U       |  | 24 | B5_COP_V         |
| Important features used by RF-rightFoot |                   |  |    |                  |  |    |                  |
| ID                                      | Feature           |  | ID | Feature          |  | ID | Feature          |
| 1                                       | S1_S_PR           |  | 9  | S8_CAP           |  | 17 | S2S4S6S8_CAP     |
| 2                                       | S8_COP_V          |  | 10 | B10_CAP          |  | 18 | S2_COP_V         |
| 3                                       | B_CAP             |  | 11 | S6_CAP           |  | 19 | B3_COP_U         |
| 4                                       | S5_COP_V          |  | 12 | B1_B_PR          |  | 20 | B2_CAP           |
| 5                                       | B9_CAP            |  | 13 | B5_CAP           |  | 21 | B6_CAP           |
| 6                                       | S5S7_COP_V        |  | 14 | S7_COP_V         |  | 22 | B12_B_PR         |
| 7                                       | S7S8_COP_V        |  | 15 | B12_CAP          |  |    |                  |
| 8                                       | B11_COP_V         |  | 16 | B1_CAP           |  |    |                  |

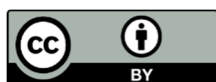

Supplement: s1 [file s1]
